# Supplementary material for: A structural basis for the antibiotic resistance conferred by an N1-methylation of A1408 in 16S rRNA
Source: PubMed Central journal article supplement — Nucleic Acids Res. 2017 Oct 3;45(21):12529–35. doi: 10.1093/nar/gkx882 (PMC5716097; doi:10.1093/nar/gkx882), 2017-10-03
Supplement: gkx882_supp.pdf [file gkx882_supp.pdf]

**Supplementary Table 1. Crystallization conditions**

| Crystal code                          | A1408m <sup>1</sup> A                                                             | A1408m <sup>1</sup> A-G418                                                         |
|---------------------------------------|-----------------------------------------------------------------------------------|------------------------------------------------------------------------------------|
| Temperature                           | 20 °C                                                                             | 20 °C                                                                              |
| <u>Sample solution (1 µl)</u>         |                                                                                   |                                                                                    |
| RNA                                   | 1 mM                                                                              | 1 mM                                                                               |
| Aminoglycoside                        | -                                                                                 | 2 mM (G418)                                                                        |
| Sodium cacodylate (pH = 7.0)          | 50 mM                                                                             | 50 mM                                                                              |
| <u>Crystallization solution (1µl)</u> |                                                                                   |                                                                                    |
| Sodium cacodylate (pH = 7.0)          | 50 mM                                                                             | 50 mM                                                                              |
| Spermine tetrahydrochloride           | 10 mM                                                                             | 10 mM                                                                              |
| Ammonium chloride                     | 250 mM                                                                            | 400 mM                                                                             |
| Potassium chloride                    | -                                                                                 | -                                                                                  |
| 2-Methyl-2,4-pentanediol              | 10%                                                                               | 10%                                                                                |
| <u>Reservoir solution (250 µl)</u>    |                                                                                   |                                                                                    |
| 2-Methyl-2,4-pentanediol              | 40%                                                                               | 40%                                                                                |
| Crystals                              |  |  |
| Size of crystal (mm <sup>3</sup> )    | 0.10 × 0.07 × 0.01                                                                | 0.07 × 0.07 × 0.01                                                                 |

| Crystal code                          | A1408m <sup>1</sup> A-Paromomycin                                                   | A1408m <sup>1</sup> A-Gentamicin                                                     |
|---------------------------------------|-------------------------------------------------------------------------------------|--------------------------------------------------------------------------------------|
| Temperature                           | 20 °C                                                                               | 20 °C                                                                                |
| <u>Sample solution (1 µl)</u>         |                                                                                     |                                                                                      |
| RNA                                   | 1 mM                                                                                | 1 mM                                                                                 |
| Aminoglycoside                        | 2 mM (Paromomycin)                                                                  | 2 mM (Gentamicin)                                                                    |
| Sodium cacodylate (pH = 7.0)          | 50 mM                                                                               | 50 mM                                                                                |
| <u>Crystallization solution (1µl)</u> |                                                                                     |                                                                                      |
| Sodium cacodylate (pH = 7.0)          | 50 mM                                                                               | 50 mM                                                                                |
| Spermine tetrahydrochloride           | 10 mM                                                                               | 10 mM                                                                                |
| Ammonium chloride                     | 400 mM                                                                              | -                                                                                    |
| Potassium chloride                    | -                                                                                   | 250 mM                                                                               |
| 2-Methyl-2,4-pentanediol              | 10%                                                                                 | 10%                                                                                  |
| <u>Reservoir solution (250 µl)</u>    |                                                                                     |                                                                                      |
| 2-Methyl-2,4-pentanediol              | 40%                                                                                 | 40%                                                                                  |
| Crystals                              |  |  |
| Size of crystal (mm <sup>3</sup> )    | 0.05 × 0.05 × 0.01                                                                  | 0.07 × 0.07 × 0.01                                                                   |

**Supplementary Table 2.** Susceptibilities of aminoglycosides reported in Wachino *et al.*, 2007.

| Aminoglycosides                                 | Minimum inhibitory concentration ( $\mu\text{g/ml}$ ) |                                           |                                                  |
|-------------------------------------------------|-------------------------------------------------------|-------------------------------------------|--------------------------------------------------|
|                                                 | <i>E. coli</i> CSH-2                                  | <i>E. coli</i> ARS3<br>(Clinical isolate) | <i>E. coli</i> CSH-2 (pARS3)<br>(Transconjugant) |
| <b><u>4.6-Disubstituted aminoglycosides</u></b> |                                                       |                                           |                                                  |
| (6'-OH subtype)                                 |                                                       |                                           |                                                  |
| Arbekacin                                       | 0.13                                                  | 64                                        | 4                                                |
| (6'-NH <sub>3</sub> <sup>+</sup> subtype)       |                                                       |                                           |                                                  |
| Amikacin                                        | 0.13                                                  | 256                                       | 16                                               |
| Dibekacin                                       | 0.13                                                  | > 256                                     | 128                                              |
| Kanamycin                                       | 0.25                                                  | > 256                                     | > 256                                            |
| Tobramycin                                      | $\leq 0.06$                                           | > 256                                     | 128                                              |
| Gentamicin                                      | $\leq 0.06$                                           | > 256                                     | 128                                              |
| Isepamicin                                      | 0.13                                                  | > 256                                     | 64                                               |
| Netilmicin                                      | $\leq 0.06$                                           | > 256                                     | > 256                                            |
| Sisomicin                                       | $\leq 0.06$                                           | > 256                                     | > 256                                            |
| <b><u>4.5-Disubstituted aminoglycosides</u></b> |                                                       |                                           |                                                  |
| (6'-OH subtype)                                 |                                                       |                                           |                                                  |
| Paromomycin                                     | 0.5                                                   | 64                                        | 4                                                |
| (6'-NH <sub>3</sub> <sup>+</sup> subtype)       |                                                       |                                           |                                                  |
| Lividomycin A                                   | 0.5                                                   | 256                                       | 16                                               |
| Neomycin                                        | 0.13                                                  | > 256                                     | 64                                               |
| Ribostamycin                                    | 0.25                                                  | > 256                                     | > 256                                            |

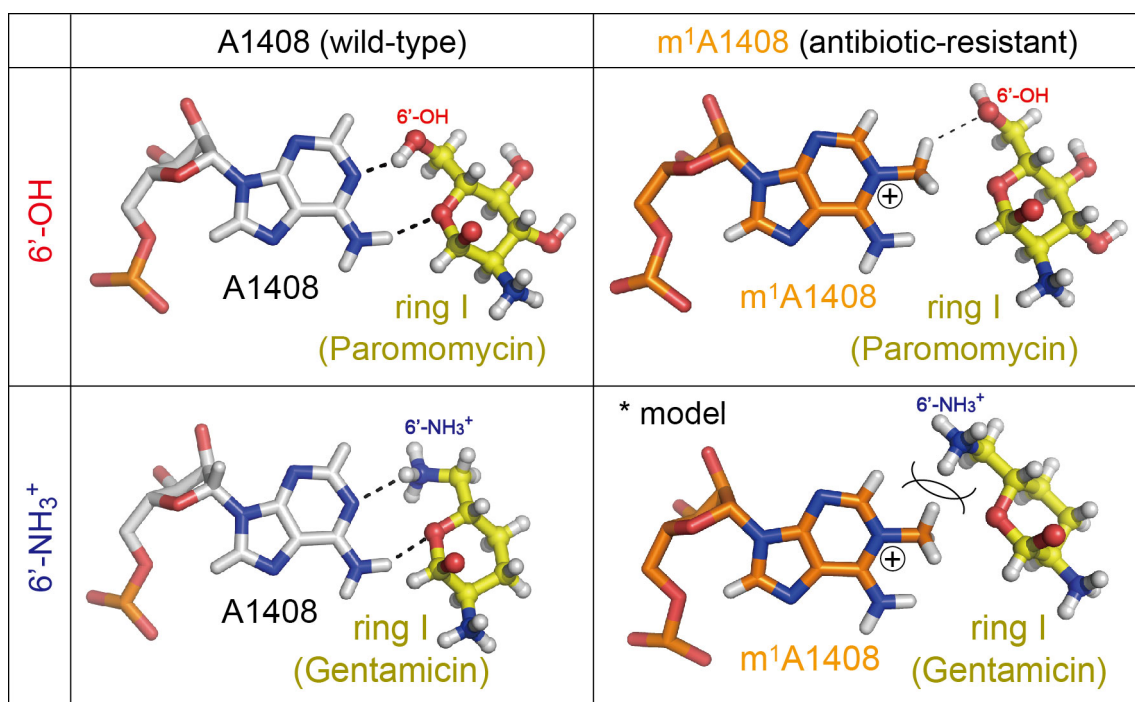

**Supplementary Figure 1.** Pseudo pairs between A/ $m^1$ A1408 and ring I with the 6'-OH or 6'-NH<sub>3</sub><sup>+</sup> groups. An impossible pseudo pair between  $m^1$ A1408 and ring I of gentamicin was constructed by molecular modeling. Other pseudo pairs were observed in crystal structures (PDB-ID = 1J7T, 2ET3 and 4WCR).

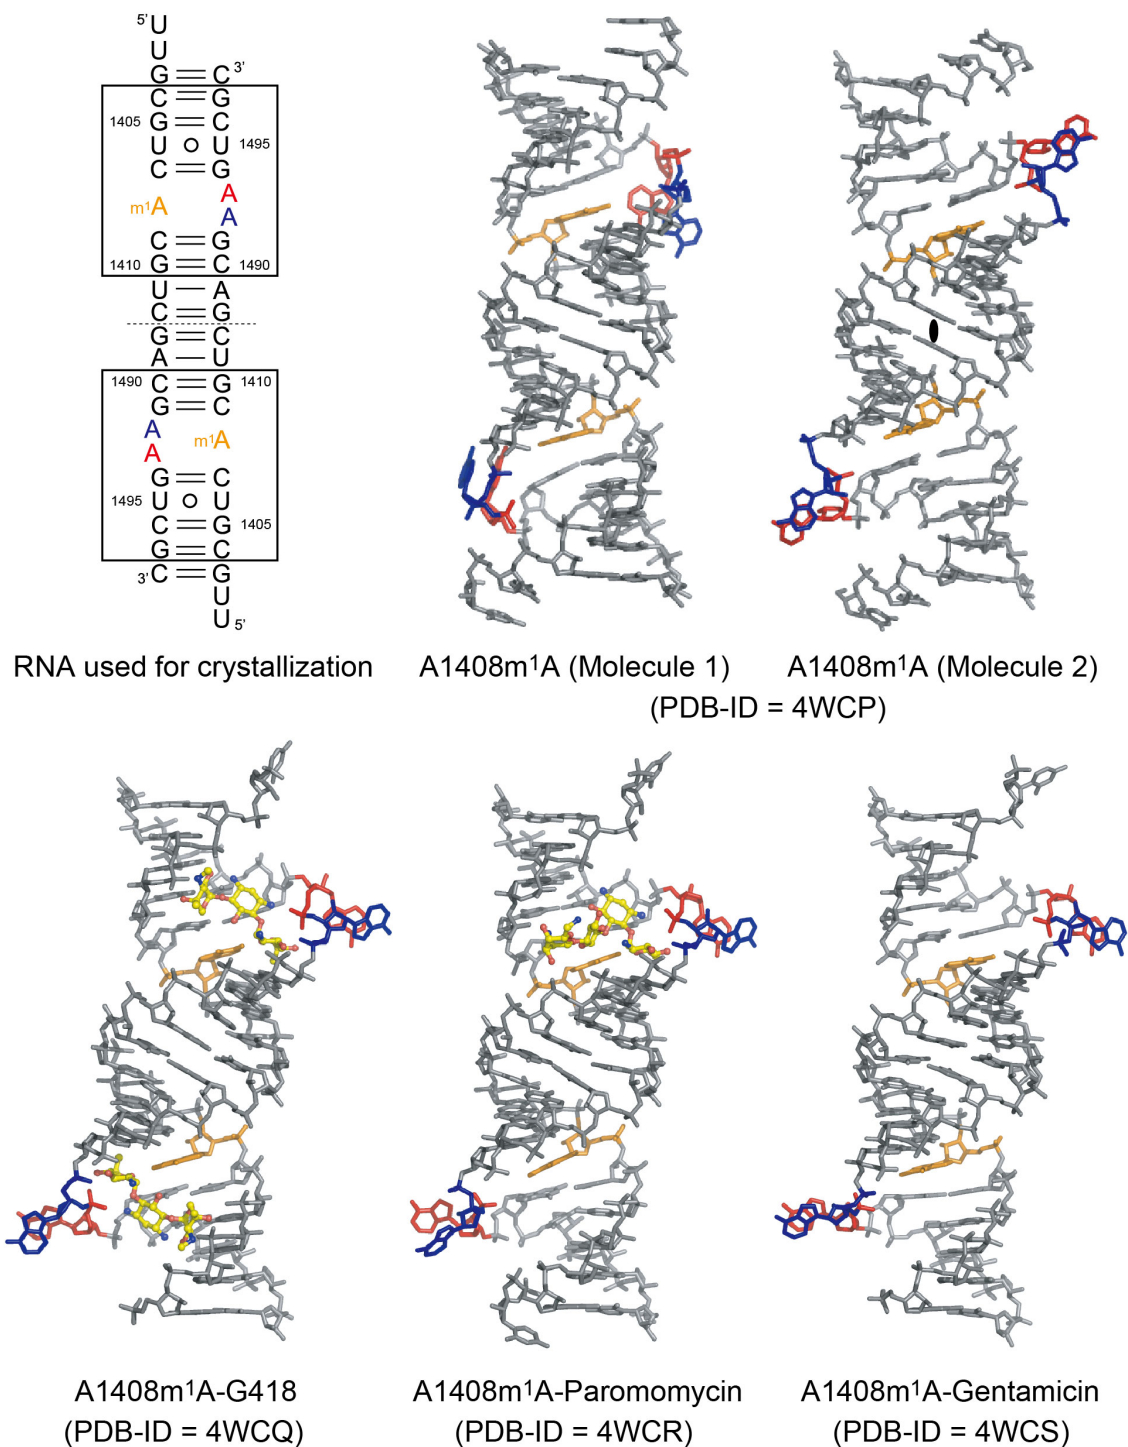

**Supplementary Figure 2.** Secondary structure of RNA used for crystallization and overall structures obtained in this study. The m<sup>1</sup>A1408, A1492 and A1493 residues are colored in orange, blue and red, respectively. Aminoglycosides G418 and paromomycin are represented by yellow ball-and-stick model. A crystallographic two-fold axis located at the center of the molecule 2 in the A1408m<sup>1</sup>A crystal is indicated by black oval.

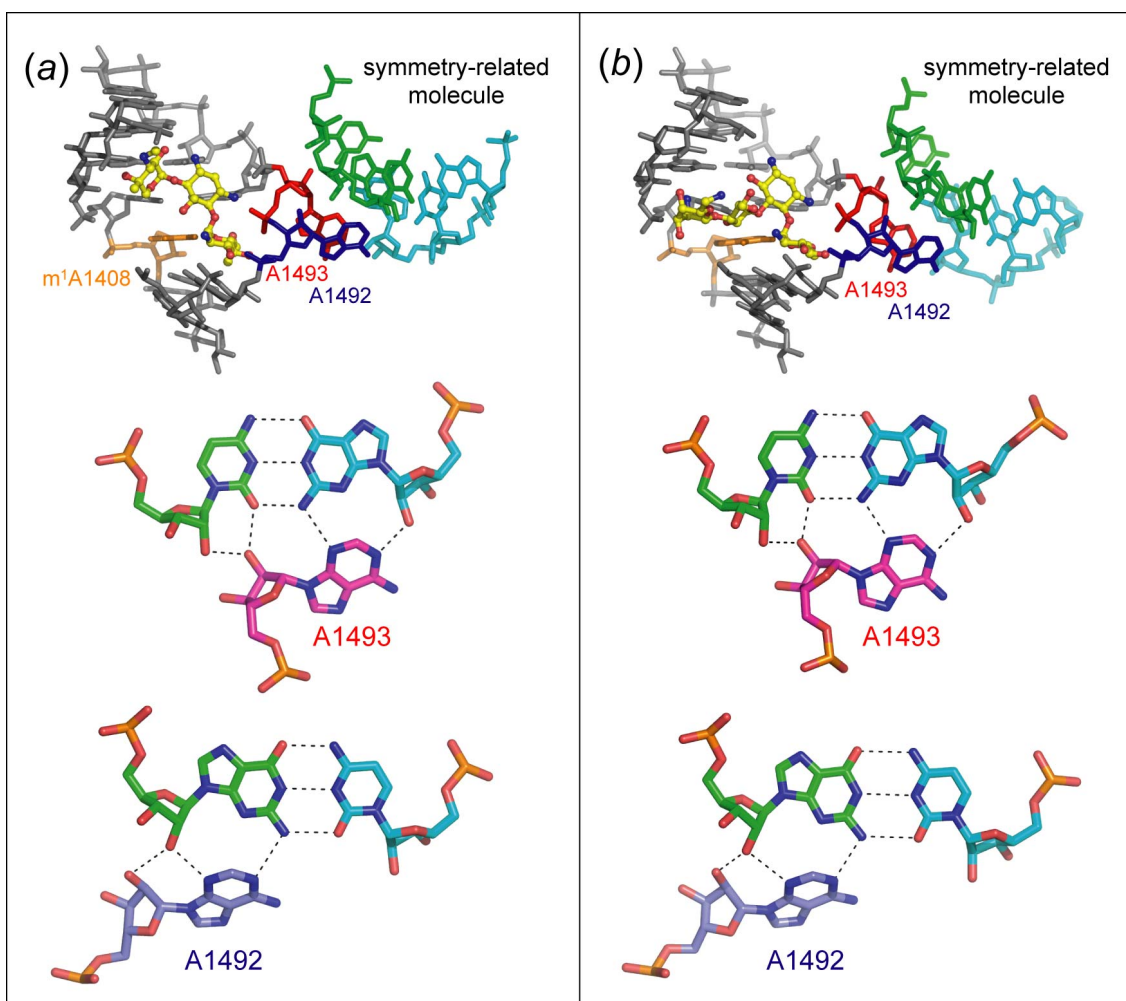

**Supplementary Figure 3.** The “on” state of the m<sup>1</sup>A1408-modified A site in complex with G418 (*a*) and paromomycin (*b*). In crystals, a symmetry-related molecule (green and cyan) mimics the tRNA-mRNA complex (top), and two Watson-Crick G=C base pairs of the molecule are recognized by A1492 and A1493 through the A-minor interactions (middle and bottom).

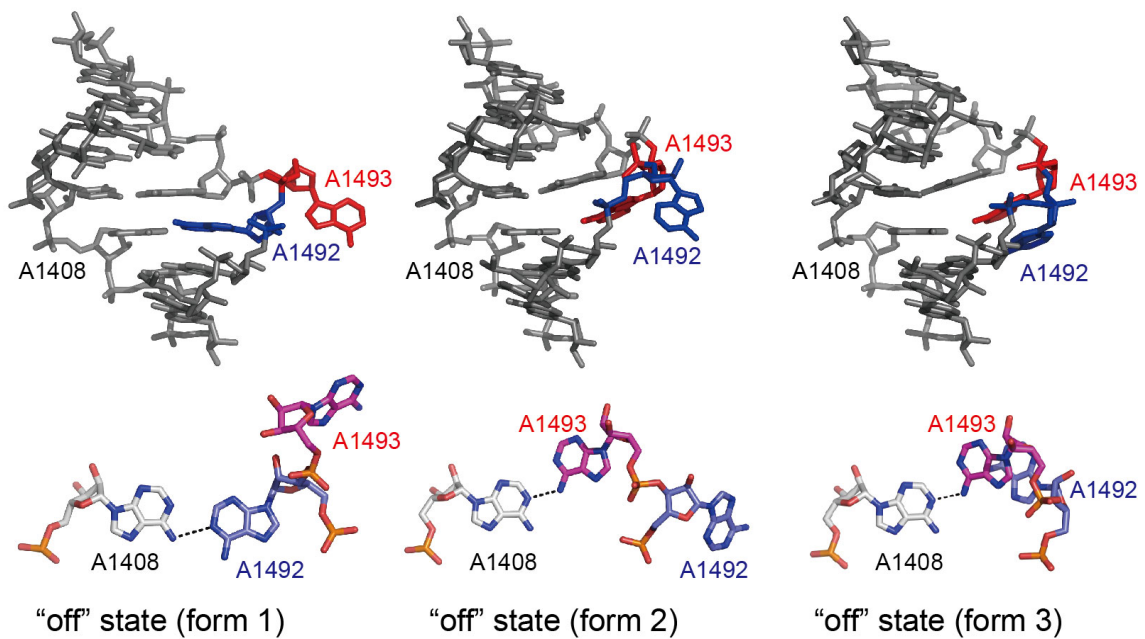

**Supplementary Figure 4.** Three different “off” states of the bacterial wild-type A site observed in crystal structures (PDB-ID = 1T0E and 3BNL). Overviews (above) and A1408oA1492 and A1408oA1493 base pairs (below) are shown. Hydrogen bonds are represented by dashed lines.
